# Supplementary material for: Potential Role of MicroRNA-375 as Biomarker in Human Cancers Detection: A Meta-Analysis
Source: Hindawi journal article supplement (doi:10.1155/2017/1875843), 2017-01-01

## Supporting Information

Figure S1. Forest plots of diagnosis score and DOR from test accuracy studies of miR-375 in the diagnosis of cancer.

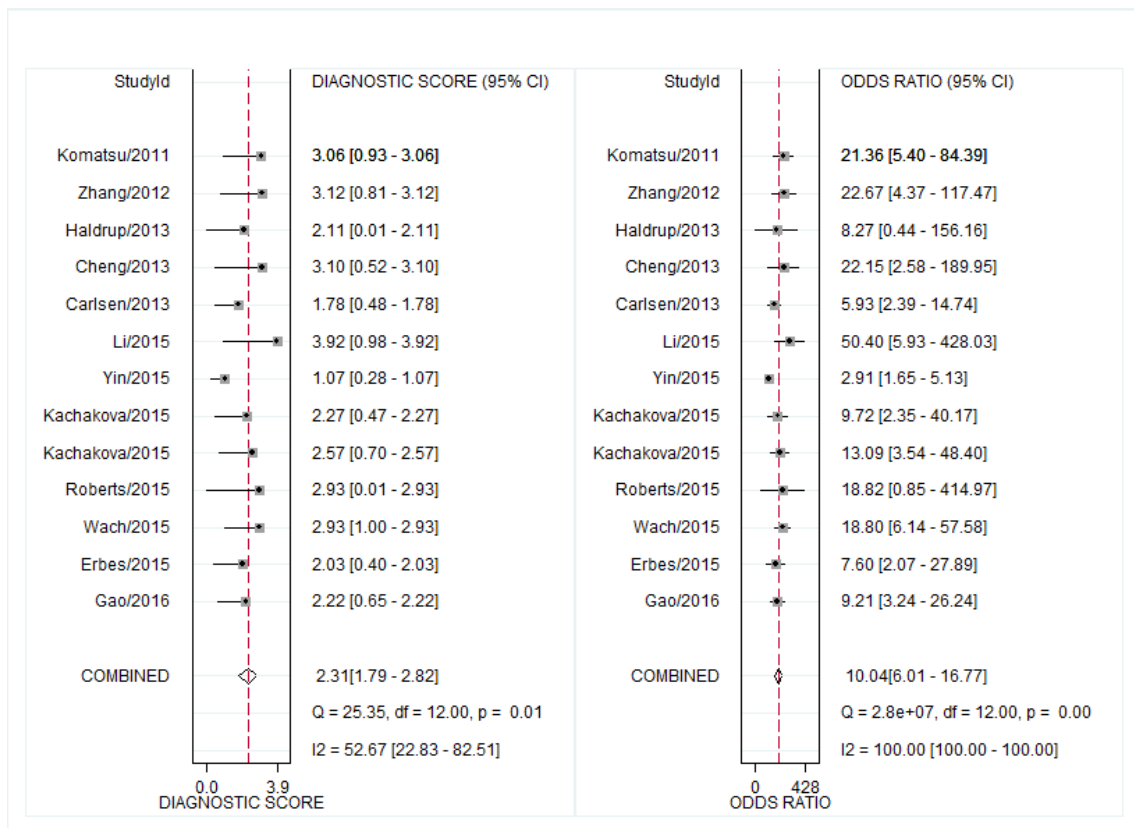

Supplement: f1 [file 1875843.f1.pdf]
